## Beneficial effect of angiotensin converter enzyme inhibitors on left ventricular deformation in patients with hematologic malignancies after bone marrow transplantation

Ikonomidis I.<sup>1</sup>; Katogiannis K.<sup>1</sup>; Stamouli M.<sup>2</sup>; Makavos G.<sup>1</sup>; Frogoudaki A.<sup>1</sup>; Vrettou AR.<sup>1</sup>; Birba D.<sup>1</sup>; Thymis J.<sup>1</sup>; Tsilivarakis D.<sup>1</sup>; Tsigiotis P.<sup>2</sup>; Eliodromitis EK.<sup>1</sup>

<sup>1</sup>National & Kapodistrian University of Athens, 2nd Cardiology Department, Athens, Greece

<sup>2</sup>National & Kapodistrian University of Athens, 2nd Department of Internal Medicine, Unit of Hematology, Athens, Greece

**Funding Acknowledgements:** Type of funding sources: Foundation. Main funding source(s): Hellenic society of lipidology, atherosclerosis and cardiovascular disease

**Background/Introduction:** Optimal medical treatment for heart failure may reverse myocardial dysfunction in the early stages of cardiotoxic treatment.

**Patients and methods:** 60 patients age  $46,3 \pm 12,9$  years old, 19 male) with preserved ejection fraction, who suffered from hematologic malignancies (lymphoma, leukemia) and underwent bone marrow transplantation, were randomized to receive 2,5 mg enalapril bid daily or placebo. We measured at baseline, before transplantation, and after three months: i) Global Longitudinal Strain of left ventricle (LV) (GLS), ii) LV Epicardial Strain (GLS<sub>epi</sub>), iii) LV Endocardial Strain (GLS<sub>endo</sub>), by speckle tracking imaging, iv) LV End Diastolic ,End Systolic Volume and Ejection Fraction (LVEF).

**Results:** The two treatment groups had similar age, sex atherosclerotic risk factors and cardiotoxic medication before and after bone marrow transplantation. Compared to baseline, patients treated with enalapril did not show a deterioration of LV GLS and GLS<sub>epi</sub> [ $p = 0,540$  and  $p = 0,422$ ]. Conversely, patients treated with placebo group, presented a significant impairment of LV GLS and GLS<sub>epi</sub> [ $p = 0,041$  and  $p = 0,028$ ] three months after bone marrow transplantation. No significant changes were found in LVEF after treatment with enalapril ( $p = 0,692$ ) or the placebo ( $p = 0,892$ ). Table 1

**Conclusions:** Treatment with enalapril prevented deterioration of myocardial deformation three months after bone marrow transplantation

Table 1

|                                            | group     | baseline          | 3 months follow-up | p     |
|--------------------------------------------|-----------|-------------------|--------------------|-------|
| Longitudinal strain apical 4 chambers view | placebo   | $-20.56 \pm 2.55$ | $-19.46 \pm 2.59$  | 0.154 |
|                                            | enalapril | $-20.41 \pm 3.31$ | $-19.70 \pm 3.70$  | 0.433 |
| Longitudinal strain apical 2 chambers view | placebo   | $-20.5 \pm 1.97$  | $-16.11 \pm 10.38$ | 0.149 |
|                                            | enalapril | $-20.30 \pm 3.90$ | $-20.00 \pm 3.82$  | 0.763 |
| Longitudinal strain apical 3 chambers view | placebo   | $-19.55 \pm 2.36$ | $-18.55 \pm 2.43$  | 0.197 |
|                                            | enalapril | $-20.01 \pm 4.09$ | $-19.26 \pm 3.68$  | 0.489 |
| Global Longitudinal Strain                 | placebo   | $-20.19 \pm 1.76$ | $-18.96 \pm 2.08$  | 0.041 |
|                                            | enalapril | $-20.24 \pm 3.58$ | $-19.66 \pm 3.65$  | 0.540 |
| Average Global Epicardial Strain           | placebo   | $-17.82 \pm 1.45$ | $-16.60 \pm 1.68$  | 0.028 |
|                                            | enalapril | $-17.84 \pm 3.09$ | $-17.16 \pm 3.20$  | 0.422 |
| Average Global Endocardial Strain          | placebo   | $-23.03 \pm 2.15$ | $-21.96 \pm 2.56$  | 0.181 |
|                                            | enalapril | $-23.07 \pm 4.19$ | $-23.60 \pm 4.17$  | 0.666 |
| EF (Simpon's method)                       | placebo   | $59.46 \pm 6.59$  | $59.69 \pm 6.79$   | 0.892 |
|                                            | enalapril | $58.65 \pm 7.63$  | $59.45 \pm 9.28$   | 0.692 |

Left ventricular parameters during 3 months of follow-up.
